# Supplementary material
Source: publisher figshare collection journal article supplement (https://acs.figshare.com/ndownloader/files/5904420)
Supplement: Supplementary file 1 [file 5904420]

# Supporting Information

## **Doxorubicin-Incorporated Nanotherapeutic Delivery System Based on Gelatin-Coated Gold Nanoparticles: Formulation, Drug Release, and Multimodal Imaging of Cellular Internalization**

Sorina Suarasan<sup>†</sup>, Monica Focsan<sup>†</sup>, Monica Potara<sup>†</sup>, Olga Soritau<sup>‡</sup>, Adrian Florea<sup>§</sup>, Dana Maniu<sup>†,||</sup>  
Simion Astilean<sup>\*,†,||</sup>

<sup>†</sup> Nanobiophotonics and Laser Microspectroscopy Center, Interdisciplinary Research Institute on Bio-Nano-Sciences Babes-Bolyai University, T. Laurian Str. 42, 400271, Cluj-Napoca, Romania

<sup>‡</sup> Laboratory of Cell Biology and Radiobiology "Ion Chiricuta" Institute of Oncology, Republicii Str. 34-36, 400015 Cluj-Napoca, Romania

<sup>§</sup> Department of Cell and Molecular Biology, Faculty of Medicine, "Iuliu Hatieganu" University of Medicine and Pharmacy, Louis Pasteur Str. 6, 400349 Cluj-Napoca, Romania

<sup>||</sup> Department of Biomolecular Physics, Faculty of Physics, Babes-Bolyai University, M Kogalniceanu Str 1, 400084, Cluj-Napoca, Romania

\* Corresponding author: e-mail: [simion.astilean@phys.ubbcluj.ro](mailto:simion.astilean@phys.ubbcluj.ro)

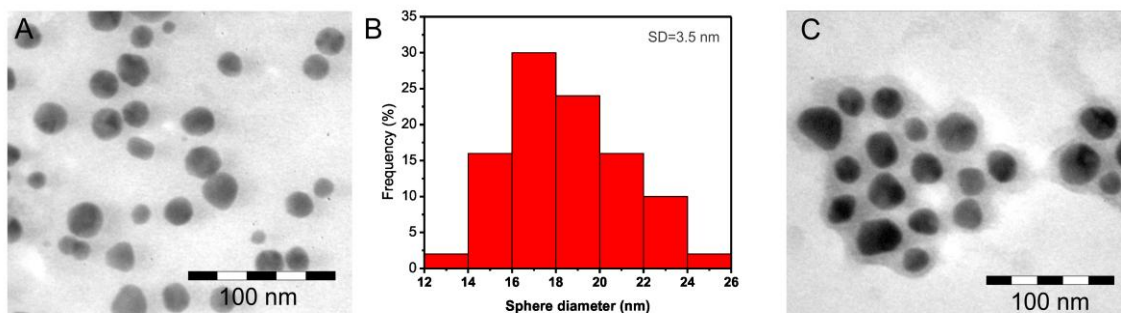

**Figure S1.** (A) TEM image of spherical bio-synthesized AuNPs@gelatin and (B) corresponding histogram; (C) TEM image of DOX-AuNPs@gelatin nano-chemotherapeutic system. SD represents standard deviation.

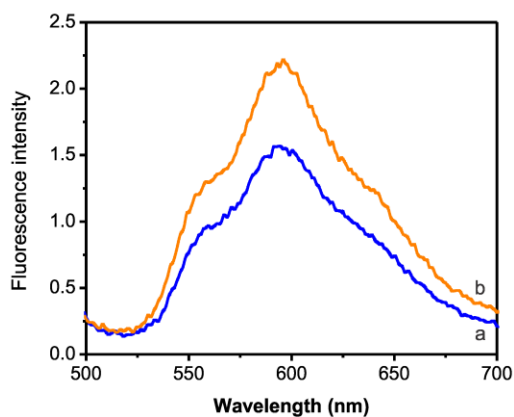

**Figure S2.** Fluorescence emission of DOX-AuNPs@gelatin chemotherapeutic system (a) immediately after purification and (b) after one week in water

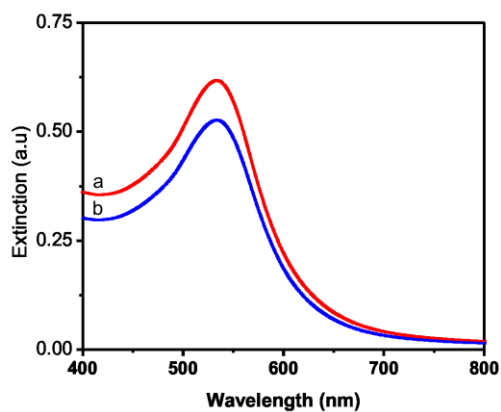

**Figure S3.** LSPR spectra of DOX-AuNPs@gelatin (a) in ultrapure water (b) at physiological temperature of 37 °C in 0.9% NaCl solution recorded after 48 h

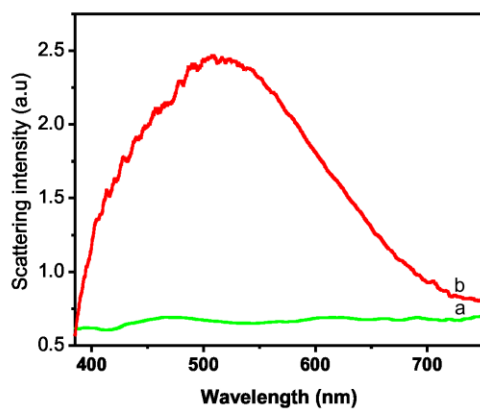

**Figure S4.** Background corrected scattering spectra recorded from a MCF-7 cell (a) untreated (b) treated with DOX-AuNPs@gelatin

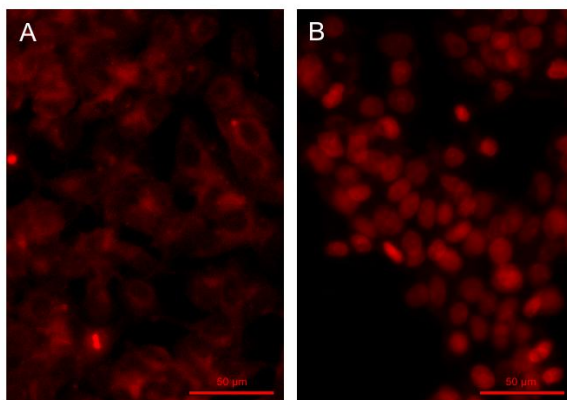

**Figure S5.** Magnified fluorescence images of MCF-7 cells treated with (A) DOX-AuNPs@gelatin and (B) free DOX for 24 h. Scale bars indicate 50  $\mu\text{m}$

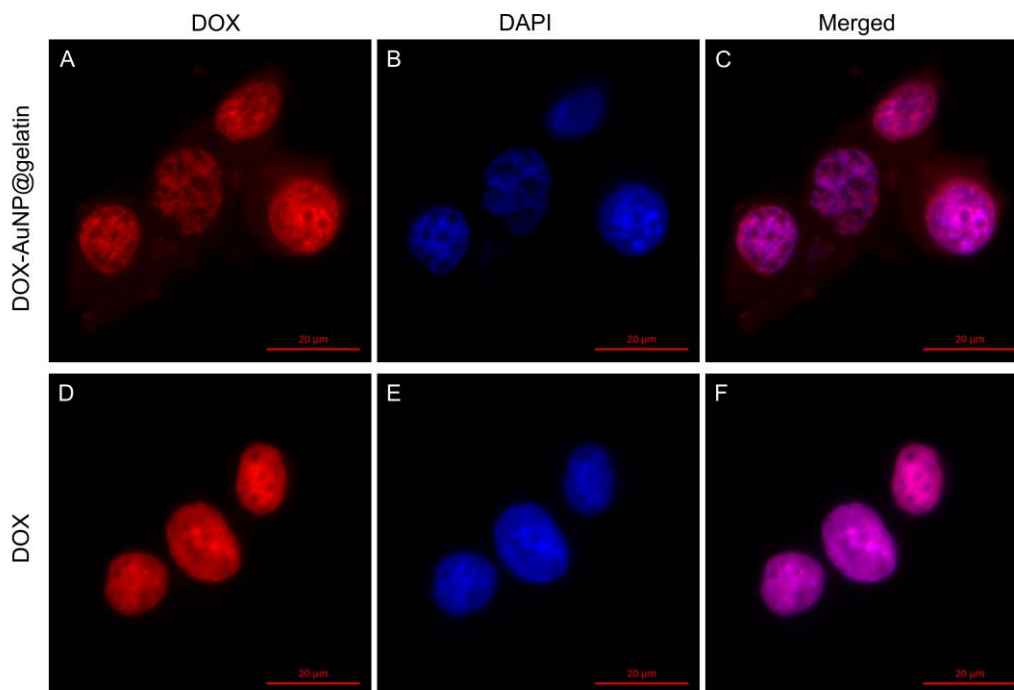

**Figure S6.** Fluorescence images of MCF-7 cells treated for 48 h with DOX-AuNPs@gelatin and free DOX, showing the different (A) intracellular released and (D) free DOX internalization into nuclei, (B, E) DAPI stained nuclei and (C, F) merged images

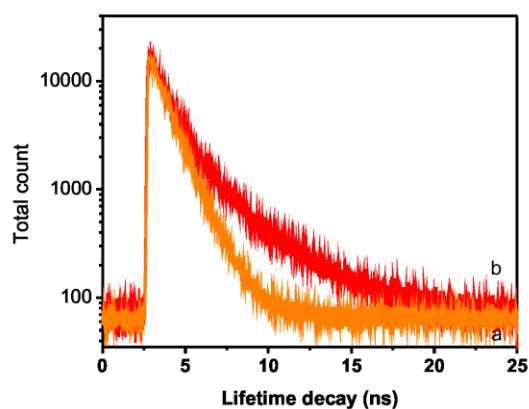

**Figure S7.** Lifetime decay curves of (a) free DOX ( $1.0 \pm 0.001$  ns) and (b) DOX loaded onto AuNPs@gelatin ( $1.9 \pm 0.002$  ns) in solution

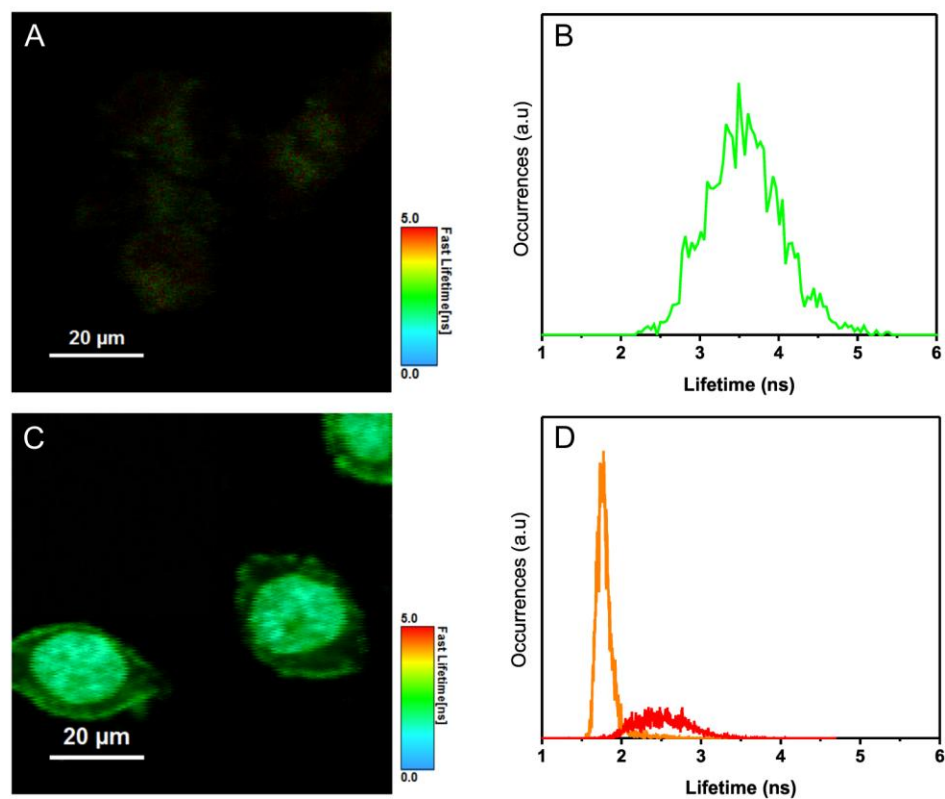

**Figure S8.** (A) FLIM image and (B) histogram of MCF-7 control untreated cells, (C) FLIM image and (D) histogram of MCF-7 DOX treated cells for 3 h
